# Supplementary material
Source: ML conference proceedings conference paper supplement (https://openreview.net/forum?id=xt4oAjRL7g)
Supplement: supplementary_material [file attachment]

## Appendix A. Results with other kernels

We replicate the experiments in Section 5.2 with the radial basis function (RBF) and inverse multi-quadric (IMQ) kernels.

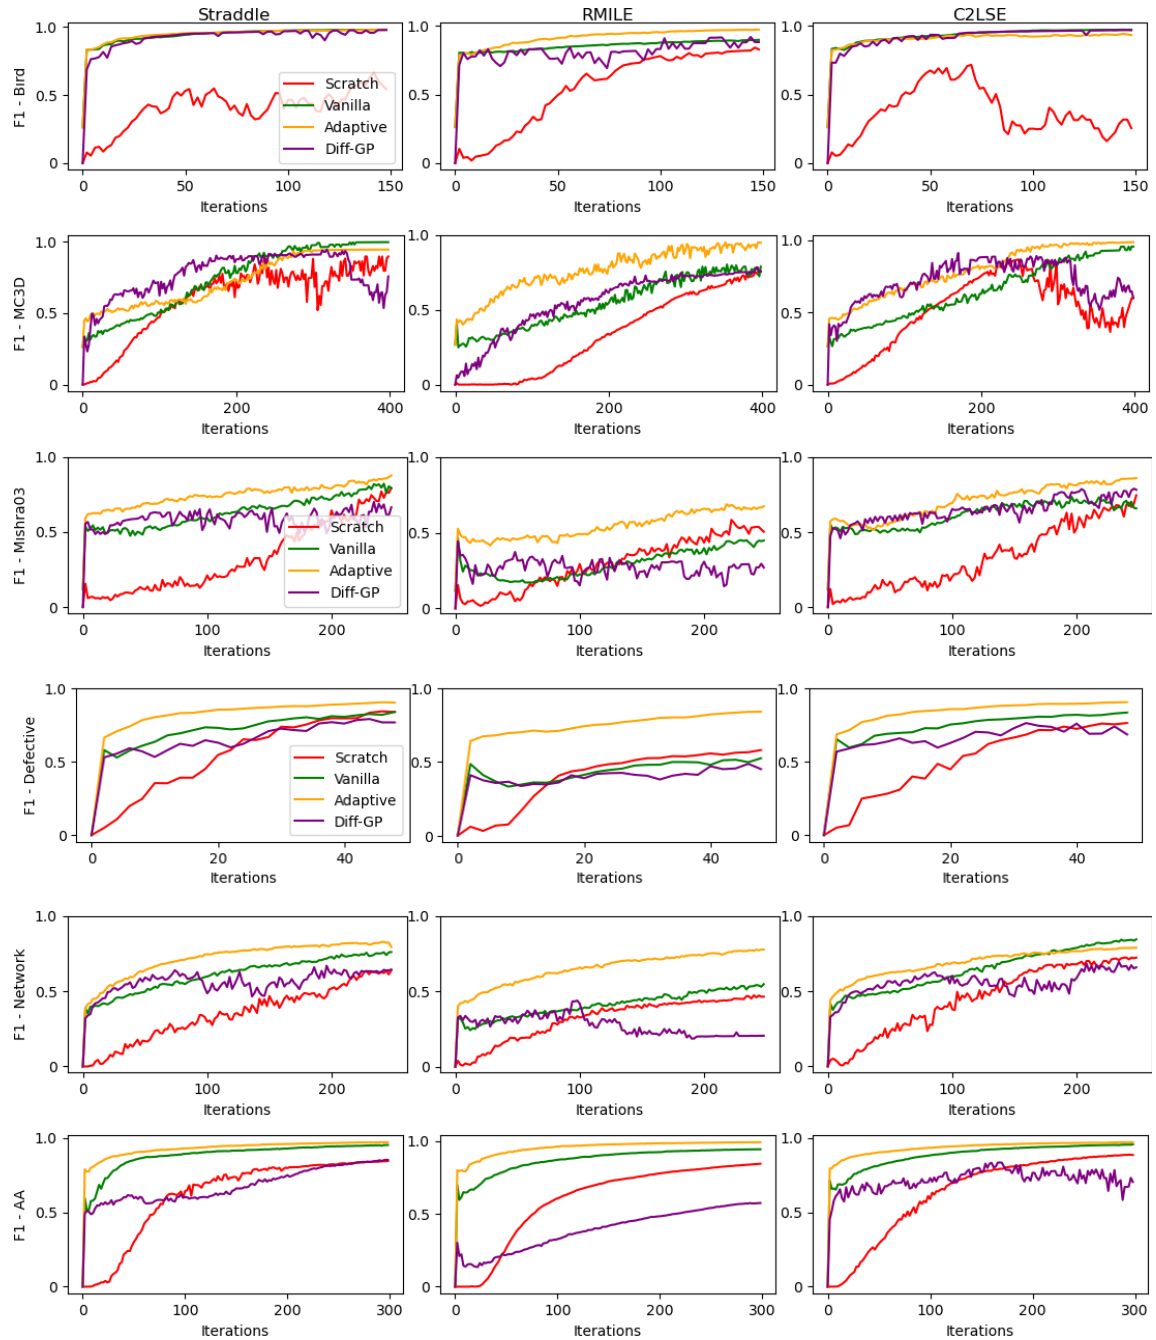

Figure 4: Transfer learning for active LSE with RBF kernel

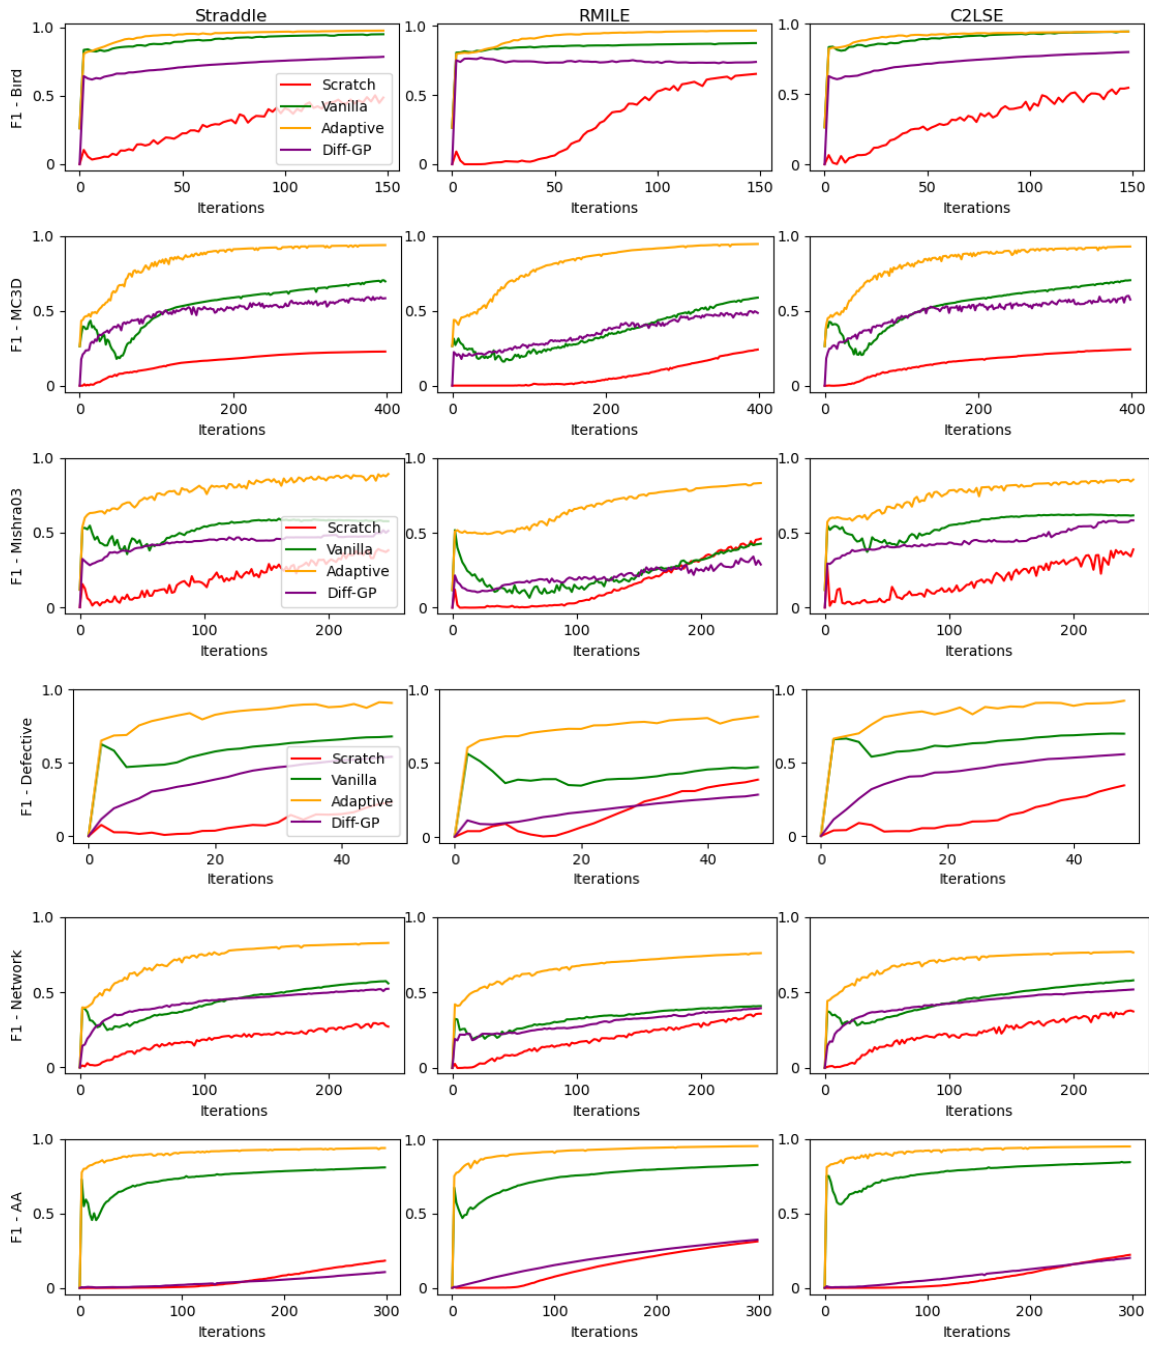

Figure 5: Transfer learning for active LSE with IMQ kernel
